# Supplementary material for: High temperature reaction of Sn(3P0) atoms with O2 based on Sn- and O-concentration measurements
Source: Royal Society of Chemistry journal article supplement (doi:10.1039/b103341g), 2001-01-01
Supplement: table.pdf [file table.pdf]

Table S1: Summary of rate coefficients measured for the reaction  
 $\text{Sn}(^3\text{P}) + \text{O}_2 \rightarrow \text{Products} (1)$

| $P_1^a$<br>/ mbar                                                 | $U_s^b$<br>/ m·ms <sup>-1</sup> | Reflected shock region |                                             |                                                               |                                                 | $k_1$<br>/cm <sup>3</sup> molecule <sup>-1</sup> s <sup>-1</sup> |
|-------------------------------------------------------------------|---------------------------------|------------------------|---------------------------------------------|---------------------------------------------------------------|-------------------------------------------------|------------------------------------------------------------------|
|                                                                   |                                 | $T$<br>/ K             | $[\text{M}]$<br>/molecules·cm <sup>-3</sup> | $[\text{Sn}(\text{CH}_3)_4]_0$<br>/molecules·cm <sup>-3</sup> | $[\text{O}_2]_0$<br>/molecules·cm <sup>-3</sup> |                                                                  |
| <u><math>[\text{O}_2]/[\text{Sn}(\text{CH}_3)_4] = 100</math></u> |                                 |                        |                                             |                                                               |                                                 |                                                                  |
| 42.1                                                              | 738.2                           | 1312                   | $5.301 \times 10^{18}$                      | $5.301 \times 10^{11}$                                        | $5.301 \times 10^{13}$                          | $1.339 \times 10^{-10}$                                          |
| 42.1                                                              | 763.8                           | 1397                   | $5.201 \times 10^{18}$                      | $5.201 \times 10^{11}$                                        | $5.201 \times 10^{13}$                          | $1.496 \times 10^{-10}$                                          |
| 35.1                                                              | 786.0                           | 1471                   | $4.734 \times 10^{18}$                      | $4.734 \times 10^{11}$                                        | $4.734 \times 10^{13}$                          | $1.527 \times 10^{-10}$                                          |
| 32.1                                                              | 818.9                           | 1587                   | $4.505 \times 10^{18}$                      | $4.505 \times 10^{11}$                                        | $4.505 \times 10^{13}$                          | $1.607 \times 10^{-10}$                                          |
| 29.1                                                              | 835.7                           | 1662                   | $4.180 \times 10^{18}$                      | $4.180 \times 10^{11}$                                        | $4.180 \times 10^{13}$                          | $1.770 \times 10^{-10}$                                          |
| 27.1                                                              | 850.5                           | 1702                   | $3.916 \times 10^{18}$                      | $3.916 \times 10^{11}$                                        | $3.916 \times 10^{13}$                          | $1.747 \times 10^{-10}$                                          |
| 25.6                                                              | 862.1                           | 1745                   | $3.764 \times 10^{18}$                      | $3.764 \times 10^{11}$                                        | $3.764 \times 10^{13}$                          | $1.724 \times 10^{-10}$                                          |
| 24.1                                                              | 877.8                           | 1807                   | $3.498 \times 10^{18}$                      | $3.498 \times 10^{11}$                                        | $3.498 \times 10^{13}$                          | $1.930 \times 10^{-10}$                                          |
| 23.5                                                              | 914.2                           | 1946                   | $3.661 \times 10^{18}$                      | $3.661 \times 10^{11}$                                        | $3.661 \times 10^{13}$                          | $1.849 \times 10^{-10}$                                          |
| 21.5                                                              | 918.2                           | 1961                   | $3.363 \times 10^{18}$                      | $3.363 \times 10^{11}$                                        | $3.363 \times 10^{13}$                          | $1.957 \times 10^{-10}$                                          |
| 18.1                                                              | 940.0                           | 2050                   | $2.868 \times 10^{18}$                      | $2.868 \times 10^{11}$                                        | $2.868 \times 10^{13}$                          | $1.890 \times 10^{-10}$                                          |
| 18.1                                                              | 964.0                           | 2149                   | $2.913 \times 10^{18}$                      | $2.913 \times 10^{11}$                                        | $2.913 \times 10^{13}$                          | $1.929 \times 10^{-10}$                                          |
| 15.0                                                              | 981.2                           | 2222                   | $2.454 \times 10^{18}$                      | $2.454 \times 10^{11}$                                        | $2.454 \times 10^{13}$                          | $2.090 \times 10^{-10}$                                          |
| <u><math>[\text{O}_2]/[\text{Sn}(\text{CH}_3)_4] = 150</math></u> |                                 |                        |                                             |                                                               |                                                 |                                                                  |
| 40.2                                                              | 762.1                           | 1390                   | $5.288 \times 10^{18}$                      | $5.288 \times 10^{11}$                                        | $7.932 \times 10^{13}$                          | $1.450 \times 10^{-10}$                                          |
| 40.2                                                              | 767.0                           | 1406                   | $5.366 \times 10^{18}$                      | $5.366 \times 10^{11}$                                        | $8.049 \times 10^{13}$                          | $1.466 \times 10^{-10}$                                          |
| 36.1                                                              | 784.0                           | 1464                   | $4.919 \times 10^{18}$                      | $4.919 \times 10^{11}$                                        | $7.379 \times 10^{13}$                          | $1.477 \times 10^{-10}$                                          |
| 32.3                                                              | 813.1                           | 1565                   | $4.557 \times 10^{18}$                      | $4.557 \times 10^{11}$                                        | $6.836 \times 10^{13}$                          | $1.609 \times 10^{-10}$                                          |
| 29.0                                                              | 833.0                           | 1637                   | $4.178 \times 10^{18}$                      | $4.178 \times 10^{11}$                                        | $6.267 \times 10^{13}$                          | $1.691 \times 10^{-10}$                                          |
| 25.8                                                              | 867.1                           | 1763                   | $3.852 \times 10^{18}$                      | $3.852 \times 10^{11}$                                        | $5.778 \times 10^{13}$                          | $1.783 \times 10^{-10}$                                          |
| 25.8                                                              | 871.2                           | 1779                   | $3.868 \times 10^{18}$                      | $3.868 \times 10^{11}$                                        | $5.802 \times 10^{13}$                          | $1.827 \times 10^{-10}$                                          |
| 27.0                                                              | 873.5                           | 1787                   | $4.049 \times 10^{18}$                      | $4.049 \times 10^{11}$                                        | $6.074 \times 10^{13}$                          | $1.762 \times 10^{-10}$                                          |
| 23.9                                                              | 896.8                           | 1877                   | $3.669 \times 10^{18}$                      | $3.669 \times 10^{11}$                                        | $5.504 \times 10^{13}$                          | $1.926 \times 10^{-10}$                                          |
| 19.0                                                              | 923.2                           | 1981                   | $2.985 \times 10^{18}$                      | $2.985 \times 10^{11}$                                        | $4.478 \times 10^{13}$                          | $1.961 \times 10^{-10}$                                          |
| 22.1                                                              | 924.8                           | 1988                   | $3.475 \times 10^{18}$                      | $3.475 \times 10^{11}$                                        | $5.213 \times 10^{13}$                          | $2.014 \times 10^{-10}$                                          |
| 18.1                                                              | 956.6                           | 2118                   | $2.922 \times 10^{18}$                      | $2.922 \times 10^{11}$                                        | $4.383 \times 10^{13}$                          | $2.145 \times 10^{-10}$                                          |
| 20.0                                                              | 939.9                           | 2127                   | $3.233 \times 10^{18}$                      | $3.233 \times 10^{11}$                                        | $4.850 \times 10^{13}$                          | $2.011 \times 10^{-10}$                                          |

<sup>a</sup> Pressure ahead of incident shock wave.

<sup>b</sup> Incident shock velocity.

*Continued on the following page*

Table S1: *Continued*

| Reflected shock region                                        |                      |      |                             |                                                   |                                |                                                         |
|---------------------------------------------------------------|----------------------|------|-----------------------------|---------------------------------------------------|--------------------------------|---------------------------------------------------------|
| $P_1^a$                                                       | $U_s^b$              | $T$  | [M]                         | [Sn(CH <sub>3</sub> ) <sub>4</sub> ] <sub>0</sub> | [O <sub>2</sub> ] <sub>0</sub> | $k_1$                                                   |
| / mbar                                                        | / m·ms <sup>-1</sup> | / K  | /molecules·cm <sup>-3</sup> | /molecules·cm <sup>-3</sup>                       | /molecules·cm <sup>-3</sup>    | /cm <sup>3</sup> molecule <sup>-1</sup> s <sup>-1</sup> |
| <u>[O<sub>2</sub>]/[Sn(CH<sub>3</sub>)<sub>4</sub>] = 200</u> |                      |      |                             |                                                   |                                |                                                         |
| 41.2                                                          | 761.9                | 1390 | 5.388×10 <sup>18</sup>      | 5.388×10 <sup>11</sup>                            | 1.078×10 <sup>14</sup>         | 1.420×10 <sup>-10</sup>                                 |
| 41.1                                                          | 771.3                | 1422 | 5.448×10 <sup>18</sup>      | 5.448×10 <sup>11</sup>                            | 1.090×10 <sup>14</sup>         | 1.423×10 <sup>-10</sup>                                 |
| 37.0                                                          | 775.9                | 1437 | 4.940×10 <sup>18</sup>      | 4.940×10 <sup>11</sup>                            | 9.880×10 <sup>13</sup>         | 1.528×10 <sup>-10</sup>                                 |
| 33.0                                                          | 765.2                | 1503 | 4.508×10 <sup>18</sup>      | 4.508×10 <sup>11</sup>                            | 9.016×10 <sup>13</sup>         | 1.708×10 <sup>-10</sup>                                 |
| 32.6                                                          | 820.2                | 1592 | 4.578×10 <sup>18</sup>      | 4.578×10 <sup>11</sup>                            | 9.156×10 <sup>13</sup>         | 1.551×10 <sup>-10</sup>                                 |
| 30.1                                                          | 832.2                | 1635 | 4.294×10 <sup>18</sup>      | 4.294×10 <sup>11</sup>                            | 8.588×10 <sup>13</sup>         | 1.782×10 <sup>-10</sup>                                 |
| 25.9                                                          | 843.1                | 1674 | 3.747×10 <sup>18</sup>      | 3.747×10 <sup>11</sup>                            | 7.494×10 <sup>13</sup>         | 1.735×10 <sup>-10</sup>                                 |
| 25.9                                                          | 860.9                | 1741 | 3.833×10 <sup>18</sup>      | 3.833×10 <sup>11</sup>                            | 7.666×10 <sup>13</sup>         | 1.761×10 <sup>-10</sup>                                 |
| 24.0                                                          | 888.7                | 1846 | 3.648×10 <sup>18</sup>      | 3.648×10 <sup>11</sup>                            | 7.296×10 <sup>13</sup>         | 1.768×10 <sup>-10</sup>                                 |
| 22.0                                                          | 905.4                | 1911 | 3.386×10 <sup>18</sup>      | 3.386×10 <sup>11</sup>                            | 6.772×10 <sup>13</sup>         | 1.905×10 <sup>-10</sup>                                 |
| 18.0                                                          | 954.3                | 2030 | 2.836×10 <sup>18</sup>      | 2.836×10 <sup>11</sup>                            | 5.672×10 <sup>13</sup>         | 2.080×10 <sup>-10</sup>                                 |
| 20.1                                                          | 935.3                | 2031 | 3.169×10 <sup>18</sup>      | 3.169×10 <sup>11</sup>                            | 6.338×10 <sup>13</sup>         | 2.004×10 <sup>-10</sup>                                 |
| 18.1                                                          | 964.0                | 2149 | 2.927×10 <sup>18</sup>      | 2.927×10 <sup>11</sup>                            | 5.854×10 <sup>13</sup>         | 2.101×10 <sup>-10</sup>                                 |

<sup>a</sup> Pressure ahead of incident shock wave.

<sup>b</sup> Incident shock velocity.
